# Supplementary material for: Accurate quantum-chemical fragmentation calculations for ion–water clusters with the density-based many-body expansion
Source: Royal Society of Chemistry journal article supplement (doi:10.1039/d2cp04539g), 2022-11-29
Supplement: d2cp04539g1.pdf [file d2cp04539g1.pdf]

# Accurate quantum-chemical fragmentation calculations for ion–water clusters with the density-based many-body expansion

Stefanie Schürmann<sup>1</sup>, Johannes R. Vornweg<sup>2</sup>, Mario Wolter<sup>3</sup>,  
Christoph R. Jacob<sup>\*,4</sup>

Technische Universität Braunschweig,  
Institute of Physical and Theoretical Chemistry,  
Gaußstraße 17, 38106 Braunschweig, Germany

## Supporting Information

---

<sup>1</sup>ORCID: 0000-0002-0230-7263

<sup>2</sup>ORCID: 0000-0002-1457-0173

<sup>3</sup>ORCID: 0000-0001-6948-6801

<sup>4</sup>ORCID: 0000-0002-6227-8476, E-Mail: c.jacob@tu-braunschweig.de

## S1 $\text{Ca}^{2+}(\text{H}_2\text{O})_N$ ( $N = 3, \dots, 20$ )

The following tables S1 to S4 contain additional raw data for the calculations presented in Section 3.1 of the main text.

Table S1: Total interaction energy  $E_{\text{int}}^{(n)}$ , errors in the total interaction energy  $\Delta E_{\text{int}}^{(n)}$ , and errors in the total interaction energy per water molecule  $\Delta E_{\text{int}}^{(n)}/N$  for  $\text{Ca}^{2+}(\text{H}_2\text{O})_N$  clusters of increasing size ( $N = 3, \dots, 20$ ) for an energy-based two-body [eb-MBE(2)] and three-body expansion [eb-MBE(3)] as well as for a density-based many-body expansion of first [db-MBE(1)], second [db-MBE(2)], and third [db-MBE(3)] order. The MBEs have been performed using calculations of the **isolated** monomers and dimers (“Iso”) with **PBE0/TZP**. All values are given in kJ/mol.

| $N$ | $E_{\text{int,tot}}^{\text{super}}$ | $E_{\text{int,tot}}^{\text{xx-MBE}(n)}$ |          |          |          |          | $\Delta E_{\text{int}}^{\text{xx-MBE}(n)}$ |        |        |        |         | $\Delta E_{\text{int}}^{\text{xx-MBE}(n)}/N$ |       |       |       |        |
|-----|-------------------------------------|-----------------------------------------|----------|----------|----------|----------|--------------------------------------------|--------|--------|--------|---------|----------------------------------------------|-------|-------|-------|--------|
|     |                                     | eb(2)                                   | eb(3)    | db(1)    | db(2)    | db(3)    | eb(2)                                      | eb(3)  | db(1)  | db(2)  | db(3)   | eb(2)                                        | eb(3) | db(1) | db(2) | db(3)  |
| 3   | -593.37                             | -651.51                                 | -589.57  | -443.97  | -569.71  | -597.21  | -58.14                                     | 3.80   | 149.39 | 23.66  | -3.84   | -19.38                                       | 1.27  | 49.80 | 7.89  | -1.28  |
| 4   | -747.42                             | -856.95                                 | -732.84  | -579.66  | -695.51  | -761.30  | -109.54                                    | 14.58  | 167.76 | 51.91  | -13.88  | -27.38                                       | 3.64  | 41.94 | 12.98 | -3.47  |
| 5   | -872.51                             | -1053.36                                | -836.62  | -708.11  | -773.25  | -908.71  | -180.85                                    | 35.89  | 164.41 | 99.26  | -36.19  | -36.17                                       | 7.18  | 32.88 | 19.85 | -7.24  |
| 6   | -986.31                             | -1244.06                                | -918.33  | -826.51  | -827.12  | -1052.97 | -257.75                                    | 67.98  | 159.79 | 159.18 | -66.67  | -42.96                                       | 11.33 | 26.63 | 26.53 | -11.11 |
| 7   | -1057.01                            | -1398.99                                | -946.00  | -926.43  | -840.89  | -1166.61 | -341.98                                    | 111.01 | 130.58 | 216.12 | -109.60 | -48.85                                       | 15.86 | 18.65 | 30.87 | -15.66 |
| 8   | -1124.88                            | -1547.70                                | -960.46  | -1018.53 | -844.36  | -1279.22 | -422.81                                    | 164.42 | 106.35 | 280.53 | -154.34 | -52.85                                       | 20.55 | 13.29 | 35.07 | -19.29 |
| 9   | -1226.33                            | -1561.03                                | -1130.05 | -1047.88 | -992.91  | -1358.03 | -334.71                                    | 96.27  | 178.45 | 233.41 | -131.71 | -37.19                                       | 10.70 | 19.83 | 25.93 | -14.63 |
| 10  | -1299.11                            | -1638.00                                | -1208.85 | -1102.11 | -1051.46 | -1445.82 | -338.89                                    | 90.26  | 197.00 | 247.65 | -146.71 | -33.89                                       | 9.03  | 19.70 | 24.77 | -14.67 |
| 11  | -1342.71                            | -1766.65                                | -1197.81 | -1179.61 | -1033.47 | -1535.19 | -423.94                                    | 144.90 | 163.09 | 309.24 | -192.48 | -38.54                                       | 13.17 | 14.83 | 28.11 | -17.50 |
| 12  | -1407.56                            | -1843.59                                | -1266.07 | -1235.13 | -1081.13 | -1623.90 | -436.04                                    | 141.49 | 172.43 | 326.42 | -216.34 | -36.34                                       | 11.79 | 14.37 | 27.20 | -18.03 |
| 13  | -1469.35                            | -1913.28                                | -1335.96 | -1285.96 | -1128.65 | -1695.24 | -443.93                                    | 133.38 | 183.39 | 340.70 | -225.89 | -34.15                                       | 10.26 | 14.11 | 26.21 | -17.38 |
| 14  | -1529.78                            | -1966.77                                | -1401.66 | -1322.39 | -1177.24 | -1830.35 | -436.98                                    | 128.12 | 207.40 | 352.54 | -300.57 | -31.21                                       | 9.15  | 14.81 | 25.18 | -21.47 |
| 15  | -1595.16                            | -2028.14                                | -1448.83 | -1367.66 | -1152.77 | -2032.91 | -432.98                                    | 146.34 | 227.50 | 442.40 | -437.74 | -28.87                                       | 9.76  | 15.17 | 29.49 | -29.18 |
| 16  | -1648.62                            | -2099.40                                | -1508.00 | -1425.00 | -1190.55 | -2103.44 | -450.78                                    | 140.61 | 223.62 | 458.07 | -454.82 | -28.17                                       | 8.79  | 13.98 | 28.63 | -28.43 |
| 17  | -1714.16                            | -2164.23                                | -1551.06 | -1472.53 | -1161.17 | -2051.20 | -450.07                                    | 163.10 | 241.63 | 552.99 | -337.04 | -26.47                                       | 9.59  | 14.21 | 32.53 | -19.83 |
| 18  | -1768.25                            | -2232.92                                | -1610.18 | -1526.82 | -1197.42 | -2093.62 | -464.67                                    | 158.07 | 241.43 | 570.82 | -325.37 | -25.81                                       | 8.78  | 13.41 | 31.71 | -18.08 |
| 19  | -1829.79                            | -2270.02                                | -1683.69 | -1544.63 | -1267.30 | -2379.49 | -440.24                                    | 146.10 | 285.15 | 562.49 | -549.71 | -23.17                                       | 7.69  | 15.01 | 29.60 | -28.93 |
| 20  | -1874.01                            | -2328.13                                | -1743.44 | -1573.43 | -1365.80 | -2552.91 | -454.13                                    | 130.57 | 300.58 | 508.21 | -678.91 | -22.71                                       | 6.53  | 15.03 | 25.41 | -33.95 |

Table S2: Total interaction energy  $E_{\text{int}}^{(n)}$ , errors in the total interaction energy  $\Delta E_{\text{int}}^{(n)}$ , and errors in the total interaction energy per water molecule  $\Delta E_{\text{int}}^{(n)}/N$  for  $\text{Ca}^{2+}(\text{H}_2\text{O})_N$  clusters of increasing size ( $N = 3, \dots, 20$ ) for an energy-based two-body [eb-MBE(2)] and three-body expansion [eb-MBE(3)] as well as for a density-based many-body expansion of first [db-MBE(1)], second [db-MBE(2)], and third [db-MBE(3)] order. The MBEs have been performed using electrostatic **point-charge embedding** (“PC”) with **PBE0/TZP**. All values are given in kJ/mol.

| $N$ | $E_{\text{int,tot}}^{\text{super}}$ | $E_{\text{int,tot}}^{\text{xx-MBE}(n)}$ |          |          |          |          | $\Delta E_{\text{int}}^{\text{xx-MBE}(n)}$ |        |         |       |        | $\Delta E_{\text{int}}^{\text{xx-MBE}(n)}/N$ |       |        |       |       |
|-----|-------------------------------------|-----------------------------------------|----------|----------|----------|----------|--------------------------------------------|--------|---------|-------|--------|----------------------------------------------|-------|--------|-------|-------|
|     |                                     | eb(2)                                   | eb(3)    | db(1)    | db(2)    | db(3)    | eb(2)                                      | eb(3)  | db(1)   | db(2) | db(3)  | eb(2)                                        | eb(3) | db(1)  | db(2) | db(3) |
| 3   | -593.37                             | -602.48                                 | -593.37  | -631.51  | -586.77  | -594.16  | -9.11                                      | 0.00   | -38.14  | 6.60  | -0.80  | -3.04                                        | 0.00  | -12.71 | 2.20  | -0.27 |
| 4   | -747.42                             | -760.89                                 | -750.48  | -796.21  | -733.01  | -749.81  | -13.47                                     | -3.06  | -48.79  | 14.41 | -2.39  | -3.37                                        | -0.76 | -12.20 | 3.60  | -0.60 |
| 5   | -872.51                             | -893.17                                 | -881.85  | -931.62  | -849.05  | -879.33  | -20.66                                     | -9.34  | -59.11  | 23.46 | -6.81  | -4.13                                        | -1.87 | -11.82 | 4.69  | -1.36 |
| 6   | -986.31                             | -1006.36                                | -999.31  | -1051.87 | -948.92  | -995.56  | -20.06                                     | -13.00 | -65.56  | 37.38 | -9.26  | -3.34                                        | -2.17 | -10.93 | 6.23  | -1.54 |
| 7   | -1057.01                            | -1074.94                                | -1074.41 | -1132.78 | -1020.03 | -1074.62 | -17.93                                     | -17.40 | -75.78  | 36.97 | -17.62 | -2.56                                        | -2.49 | -10.83 | 5.28  | -2.52 |
| 8   | -1124.88                            | -1135.18                                | -1138.66 | -1207.91 | -1083.20 | -1145.23 | -10.29                                     | -13.77 | -83.03  | 41.69 | -20.34 | -1.29                                        | -1.72 | -10.38 | 5.21  | -2.54 |
| 9   | -1226.33                            | -1228.94                                | -1254.72 | -1300.73 | -1190.01 | -1243.51 | -2.61                                      | -28.40 | -74.41  | 36.32 | -17.18 | -0.29                                        | -3.16 | -8.27  | 4.04  | -1.91 |
| 10  | -1299.11                            | -1298.11                                | -1334.00 | -1373.48 | -1260.80 | -1314.09 | 1.00                                       | -34.89 | -74.37  | 38.31 | -14.98 | 0.10                                         | -3.49 | -7.44  | 3.83  | -1.50 |
| 11  | -1342.71                            | -1338.98                                | -1371.40 | -1428.56 | -1302.80 | -1361.79 | 3.73                                       | -28.69 | -85.86  | 39.90 | -19.08 | 0.34                                         | -2.61 | -7.81  | 3.63  | -1.73 |
| 12  | -1407.56                            | -1400.85                                | -1440.12 | -1496.65 | -1368.53 | -1427.75 | 6.71                                       | -32.56 | -89.09  | 39.03 | -20.19 | 0.56                                         | -2.71 | -7.42  | 3.25  | -1.68 |
| 13  | -1469.35                            | -1463.99                                | -1506.89 | -1559.01 | -1428.05 | -1484.23 | 5.35                                       | -37.55 | -89.66  | 41.30 | -14.88 | 0.41                                         | -2.89 | -6.90  | 3.18  | -1.14 |
| 14  | -1529.78                            | -1517.62                                | -1568.45 | -1620.20 | -1491.00 | -1546.16 | 12.16                                      | -38.67 | -90.42  | 38.78 | -16.37 | 0.87                                         | -2.76 | -6.46  | 2.77  | -1.17 |
| 15  | -1595.16                            | -1580.44                                | -1637.29 | -1686.73 | -1554.89 | -1610.11 | 14.73                                      | -42.13 | -91.57  | 40.27 | -14.95 | 0.98                                         | -2.81 | -6.10  | 2.68  | -1.00 |
| 16  | -1648.62                            | -1637.67                                | -1695.61 | -1749.16 | -1611.15 | -1665.03 | 10.95                                      | -46.99 | -100.55 | 37.47 | -16.42 | 0.68                                         | -2.94 | -6.28  | 2.34  | -1.03 |
| 17  | -1714.16                            | -1699.66                                | -1762.50 | -1814.58 | -1673.33 | -1727.56 | 14.50                                      | -48.34 | -100.42 | 40.84 | -13.40 | 0.85                                         | -2.84 | -5.91  | 2.40  | -0.79 |
| 18  | -1768.25                            | -1757.64                                | -1820.50 | -1874.81 | -1729.66 | -1782.66 | 10.61                                      | -52.26 | -106.57 | 38.59 | -14.41 | 0.59                                         | -2.90 | -5.92  | 2.14  | -0.80 |
| 19  | -1829.79                            | -1811.02                                | -1883.22 | -1933.58 | -1786.89 | -1843.16 | 18.77                                      | -53.44 | -103.80 | 42.90 | -13.37 | 0.99                                         | -2.81 | -5.46  | 2.26  | -0.70 |
| 20  | -1874.01                            | -1849.00                                | -1924.88 | -1979.56 | -1834.18 | -1883.38 | 25.00                                      | -50.88 | -105.56 | 39.83 | -9.38  | 1.25                                         | -2.54 | -5.28  | 1.99  | -0.47 |

Table S3: Total interaction energy  $E_{\text{int}}^{(n)}$ , errors in the total interaction energy  $\Delta E_{\text{int}}^{(n)}$ , and errors in the total interaction energy per water molecule  $\Delta E_{\text{int}}^{(n)}/N$  for  $\text{Ca}^{2+}(\text{H}_2\text{O})_N$  clusters of increasing size ( $N = 3, \dots, 20$ ) for an energy-based two-body [eb-MBE(2)] and three-body expansion [eb-MBE(3)] as well as for a density-based many-body expansion of first [db-MBE(1)], second [db-MBE(2)], and third [db-MBE(3)] order. The MBEs have been performed using a **frozen-density embedding** potential obtained from isolated molecule electron densities (“**FDE**”) with **PBE0/TZP**. All values are given in kJ/mol.

| $N$ | $E_{\text{int,tot}}^{\text{super}}$ | $E_{\text{int,tot}}^{\text{xx-MBE}(n)}$ |          |          |          |          | $\Delta E_{\text{int}}^{\text{xx-MBE}(n)}$ |       |         |       |        | $\Delta E_{\text{int}}^{\text{xx-MBE}(n)}/N$ |       |        |       |       |
|-----|-------------------------------------|-----------------------------------------|----------|----------|----------|----------|--------------------------------------------|-------|---------|-------|--------|----------------------------------------------|-------|--------|-------|-------|
|     |                                     | eb(2)                                   | eb(3)    | db(1)    | db(2)    | db(3)    | eb(2)                                      | eb(3) | db(1)   | db(2) | db(3)  | eb(2)                                        | eb(3) | db(1)  | db(2) | db(3) |
| 3   | -593.37                             | -636.92                                 | -591.06  | -641.48  | -588.38  | -594.40  | -43.55                                     | 2.31  | -48.12  | 4.99  | -1.04  | -14.52                                       | 0.77  | -16.04 | 1.66  | -0.35 |
| 4   | -747.42                             | -826.27                                 | -738.99  | -808.78  | -736.72  | -749.96  | -78.86                                     | 8.43  | -61.36  | 10.70 | -2.54  | -19.71                                       | 2.11  | -15.34 | 2.67  | -0.64 |
| 5   | -872.51                             | -995.38                                 | -852.00  | -943.75  | -854.86  | -878.57  | -122.86                                    | 20.51 | -71.23  | 17.65 | -6.05  | -24.57                                       | 4.10  | -14.25 | 3.53  | -1.21 |
| 6   | -986.31                             | -1150.95                                | -944.89  | -1061.51 | -958.17  | -993.56  | -164.64                                    | 41.41 | -75.20  | 28.14 | -7.26  | -27.44                                       | 6.90  | -12.53 | 4.69  | -1.21 |
| 7   | -1057.01                            | -1249.38                                | -1000.20 | -1134.99 | -1031.08 | -1071.09 | -192.37                                    | 56.81 | -77.98  | 25.93 | -14.09 | -27.48                                       | 8.12  | -11.14 | 3.70  | -2.01 |
| 8   | -1124.88                            | -1338.99                                | -1044.34 | -1201.70 | -1096.24 | -1140.83 | -214.10                                    | 80.54 | -76.82  | 28.64 | -15.95 | -26.76                                       | 10.07 | -9.60  | 3.58  | -1.99 |
| 9   | -1226.33                            | -1419.06                                | -1179.23 | -1302.76 | -1202.41 | -1240.36 | -192.73                                    | 47.10 | -76.44  | 23.92 | -14.04 | -21.41                                       | 5.23  | -8.49  | 2.66  | -1.56 |
| 10  | -1299.11                            | -1497.38                                | -1257.18 | -1375.13 | -1273.78 | -1311.52 | -198.27                                    | 41.93 | -76.03  | 25.33 | -12.41 | -19.83                                       | 4.19  | -7.60  | 2.53  | -1.24 |
| 11  | -1342.71                            | -1564.08                                | -1275.26 | -1421.83 | -1317.27 | -1358.92 | -221.38                                    | 67.45 | -79.12  | 25.43 | -16.21 | -20.13                                       | 6.13  | -7.19  | 2.31  | -1.47 |
| 12  | -1407.56                            | -1634.45                                | -1342.01 | -1489.38 | -1383.68 | -1425.55 | -226.89                                    | 65.55 | -81.82  | 23.88 | -17.99 | -18.91                                       | 5.46  | -6.82  | 1.99  | -1.50 |
| 13  | -1469.35                            | -1703.44                                | -1409.08 | -1552.22 | -1443.61 | -1482.38 | -234.09                                    | 60.26 | -82.88  | 25.73 | -13.04 | -18.01                                       | 4.64  | -6.38  | 1.98  | -1.00 |
| 14  | -1529.78                            | -1766.48                                | -1468.49 | -1612.70 | -1507.39 | -1544.64 | -236.69                                    | 61.29 | -82.92  | 22.39 | -14.86 | -16.91                                       | 4.38  | -5.92  | 1.60  | -1.06 |
| 15  | -1595.16                            | -1830.25                                | -1536.18 | -1680.84 | -1572.89 | -1607.50 | -235.09                                    | 58.98 | -85.67  | 22.28 | -12.33 | -15.67                                       | 3.93  | -5.71  | 1.49  | -0.82 |
| 16  | -1648.62                            | -1894.40                                | -1593.81 | -1743.32 | -1629.38 | -1663.25 | -245.78                                    | 54.80 | -94.70  | 19.24 | -14.64 | -15.36                                       | 3.43  | -5.92  | 1.20  | -0.91 |
| 17  | -1714.16                            | -1957.42                                | -1659.37 | -1810.01 | -1693.06 | -1725.31 | -243.26                                    | 54.79 | -95.84  | 21.10 | -11.15 | -14.31                                       | 3.22  | -5.64  | 1.24  | -0.66 |
| 18  | -1768.25                            | -2022.97                                | -1717.21 | -1870.33 | -1749.11 | -1781.12 | -254.72                                    | 51.04 | -102.08 | 19.13 | -12.88 | -14.15                                       | 2.84  | -5.67  | 1.06  | -0.72 |
| 19  | -1829.79                            | -2073.30                                | -1777.47 | -1929.36 | -1808.55 | -1841.52 | -243.51                                    | 52.31 | -99.57  | 21.23 | -11.73 | -12.82                                       | 2.75  | -5.24  | 1.12  | -0.62 |
| 20  | -1874.01                            | -2127.39                                | -1816.32 | -1970.89 | -1854.91 | -1883.76 | -253.38                                    | 57.69 | -96.88  | 19.10 | -9.76  | -12.67                                       | 2.88  | -4.84  | 0.96  | -0.49 |

Table S4: Total interaction energy  $E_{\text{int}}^{(n)}$ , errors in the total interaction energy  $\Delta E_{\text{int}}^{(n)}$ , and errors in the total interaction energy per water molecule  $\Delta E_{\text{int}}^{(n)}/N$  for  $\text{Ca}^{2+}(\text{H}_2\text{O})_N$  clusters of increasing size ( $N = 3, \dots, 20$ ) for an energy-based two-body [eb-MBE(2)] and three-body expansion [eb-MBE(3)] as well as for a density-based many-body expansion of first [db-MBE(1)], second [db-MBE(2)], and third [db-MBE(3)] order. The MBEs have been performed using a **frozen-density embedding** potential obtained after three freeze-and-thaw cycles (“**FDE-ft**”) with **PBE0/TZP**. All values are given in kJ/mol.

| $N$ | $E_{\text{int,tot}}^{\text{super}}$ | $E_{\text{int,tot}}^{\text{xx-MBE}(n)}$ |          |          |          |          | $\Delta E_{\text{int}}^{\text{xx-MBE}(n)}$ |       |         |       |       | $\Delta E_{\text{int}}^{\text{xx-MBE}(n)}/N$ |       |        |       |       |
|-----|-------------------------------------|-----------------------------------------|----------|----------|----------|----------|--------------------------------------------|-------|---------|-------|-------|----------------------------------------------|-------|--------|-------|-------|
|     |                                     | eb(2)                                   | eb(3)    | db(1)    | db(2)    | db(3)    | eb(2)                                      | eb(3) | db(1)   | db(2) | db(3) | eb(2)                                        | eb(3) | db(1)  | db(2) | db(3) |
| 3   | -593.37                             | -600.65                                 | -593.39  | -643.29  | -591.65  | -593.57  | -7.28                                      | -0.02 | -49.92  | 1.72  | -0.20 | -2.43                                        | -0.01 | -16.64 | 0.57  | -0.07 |
| 4   | -747.42                             | -758.13                                 | -747.26  | -812.96  | -742.44  | -747.17  | -10.71                                     | 0.16  | -65.54  | 4.98  | 0.25  | -2.68                                        | 0.04  | -16.39 | 1.24  | 0.06  |
| 5   | -872.51                             | -886.46                                 | -871.86  | -952.80  | -862.38  | -872.75  | -13.95                                     | 0.66  | -80.28  | 10.13 | -0.23 | -2.79                                        | 0.13  | -16.06 | 2.03  | -0.05 |
| 6   | -986.31                             | -1002.93                                | -980.27  | -1076.40 | -966.85  | -984.10  | -16.62                                     | 6.04  | -90.10  | 19.45 | 2.21  | -2.77                                        | 1.01  | -15.02 | 3.24  | 0.37  |
| 7   | -1057.01                            | -1074.91                                | -1051.13 | -1156.21 | -1038.43 | -1059.79 | -17.90                                     | 5.88  | -99.20  | 18.58 | -2.78 | -2.56                                        | 0.84  | -14.17 | 2.65  | -0.40 |
| 8   | -1124.88                            | -1145.78                                | -1111.22 | -1228.32 | -1102.00 | -1128.12 | -20.90                                     | 13.67 | -103.43 | 22.88 | -3.24 | -2.61                                        | 1.71  | -12.93 | 2.86  | -0.41 |
| 9   | -1226.33                            | -1234.30                                | -1225.46 | -1325.70 | -1211.06 | -1228.14 | -7.97                                      | 0.87  | -99.37  | 15.27 | -1.81 | -0.89                                        | 0.10  | -11.04 | 1.70  | -0.20 |
| 10  | -1299.11                            | -1306.10                                | -1301.51 | -1398.80 | -1283.23 | -1298.78 | -6.99                                      | -2.40 | -99.69  | 15.88 | 0.32  | -0.70                                        | -0.24 | -9.97  | 1.59  | 0.03  |
| 11  | -1342.71                            | -1355.93                                | -1336.81 | -1450.45 | -1324.64 | -1344.86 | -13.22                                     | 5.90  | -107.75 | 18.07 | -2.16 | -1.20                                        | 0.54  | -9.80  | 1.64  | -0.20 |
| 12  | -1407.56                            | -1419.62                                | -1402.25 | -1518.77 | -1391.68 | -1410.62 | -12.06                                     | 5.30  | -111.21 | 15.88 | -3.06 | -1.01                                        | 0.44  | -9.27  | 1.32  | -0.26 |
| 13  | -1469.35                            | -1482.60                                | -1467.01 | -1581.58 | -1452.19 | -1466.87 | -13.26                                     | 2.33  | -112.24 | 17.16 | 2.48  | -1.02                                        | 0.18  | -8.63  | 1.32  | 0.19  |
| 14  | -1529.78                            | -1540.87                                | -1526.37 | -1643.83 | -1516.04 | -1528.51 | -11.09                                     | 3.41  | -114.05 | 13.75 | 1.27  | -0.79                                        | 0.24  | -8.15  | 0.98  | 0.09  |
| 15  | -1595.16                            | -1603.85                                | -1592.77 | -1713.12 | -1581.80 | -1591.90 | -8.68                                      | 2.39  | -117.96 | 13.36 | 3.26  | -0.58                                        | 0.16  | -7.86  | 0.89  | 0.22  |
| 16  | -1648.62                            | -1660.04                                | -1648.59 | -1775.32 | -1638.91 | -1646.18 | -11.42                                     | 0.03  | -126.70 | 9.71  | 2.44  | -0.71                                        | 0.00  | -7.92  | 0.61  | 0.15  |
| 17  | -1714.16                            | -1722.43                                | -1713.09 | -1843.05 | -1702.49 | -1708.66 | -8.26                                      | 1.07  | -128.89 | 11.67 | 5.50  | -0.49                                        | 0.06  | -7.58  | 0.69  | 0.32  |
| 18  | -1768.25                            | -1780.59                                | -1769.30 | -1902.79 | -1759.30 | -1763.70 | -12.35                                     | -1.05 | -134.54 | 8.94  | 4.54  | -0.69                                        | -0.06 | -7.47  | 0.50  | 0.25  |
| 19  | -1829.79                            | -1834.95                                | -1827.63 | -1965.83 | -1819.45 | -1821.96 | -5.17                                      | 2.16  | -136.05 | 10.33 | 7.82  | -0.27                                        | 0.11  | -7.16  | 0.54  | 0.41  |
| 20  | -1874.01                            | -1881.52                                | -1868.60 | -2009.63 | -1866.05 | -1865.28 | -7.51                                      | 5.40  | -135.63 | 7.95  | 8.73  | -0.38                                        | 0.27  | -6.78  | 0.40  | 0.44  |

## S2 $\text{F}^-(\text{H}_2\text{O})_{10}$

The following tables S5 to S8 contain additional raw data for the calculations presented in Section 3.2 of the main text.

Table S5: Total interaction energies  $E_{\text{int}}^{\text{xx-MBE}(n)}$  (PBE0/TZP, in kJ/mol) of ten isomers of  $\text{F}^-(\text{H}_2\text{O})_{10}$  relative to the lowest-energy isomer as calculated with the energy-based MBE [eb-MBE( $n$ ),  $n = 2, 3$ ] as well as the density-based MBE [db-MBE( $n$ ),  $n = 1, 2, 3$ ]. The total interaction energies from supermolecular calculations as well as the errors in the total interaction energies compared to the supermolecular calculation  $\Delta_{\text{int}}^{\text{xx-MBE}(n)}$ , are given as reference. Included are results from both the isolated MBEs (“iso”) and the embedded MBEs using point-charge embedding (“PC”) as well as using frozen-density embedding with the unrelaxed frozen densities of the isolated fragments (“FDE”) and a relaxed frozen density obtained using freeze-and-thaw cycles (“FDE-ft”). All values are given in kJ/mol.

|           |           | iso              |                       | PC               |                       | FDE              |                       | FDE-ft           |                       |
|-----------|-----------|------------------|-----------------------|------------------|-----------------------|------------------|-----------------------|------------------|-----------------------|
|           |           | $E_{\text{int}}$ | $\Delta_{\text{int}}$ | $E_{\text{int}}$ | $\Delta_{\text{int}}$ | $E_{\text{int}}$ | $\Delta_{\text{int}}$ | $E_{\text{int}}$ | $\Delta_{\text{int}}$ |
| <b>01</b> | eb-MBE(2) | -771.88          | -169.62               | -672.37          | -70.12                | -687.42          | -85.17                | -649.52          | -47.27                |
|           | eb-MBE(3) | -475.06          | +127.20               | -554.03          | +48.22                | -550.07          | +52.18                | -571.87          | +30.38                |
|           | db-MBE(1) | -498.35          | +103.90               | -607.04          | -4.79                 | -608.35          | -6.10                 | -610.31          | -8.05                 |
|           | db-MBE(2) | -435.16          | +167.09               | -594.25          | +8.01                 | -596.06          | +6.20                 | -601.69          | +0.56                 |
|           | db-MBE(3) | -687.37          | -85.12                | -606.84          | -4.59                 | -607.41          | -5.16                 | -602.66          | -0.41                 |
|           | supermol. | -602.25          |                       | -602.25          |                       | -602.25          |                       | -602.25          |                       |
| <b>02</b> | eb-MBE(2) | -765.44          | -157.40               | -671.90          | -63.86                | -684.84          | -76.80                | -652.41          | -44.37                |
|           | eb-MBE(3) | -480.92          | +127.12               | -560.16          | +47.88                | -556.00          | +52.03                | -577.10          | +30.94                |
|           | db-MBE(1) | -487.25          | +120.79               | -610.60          | -2.56                 | -612.33          | -4.30                 | -615.38          | -7.34                 |
|           | db-MBE(2) | -442.44          | +165.60               | -600.12          | +7.91                 | -602.37          | +5.67                 | -608.03          | +0.00                 |
|           | db-MBE(3) | -691.49          | -83.46                | -612.40          | -4.37                 | -613.09          | -5.06                 | -608.40          | -0.36                 |
|           | supermol. | -608.04          |                       | -608.04          |                       | -608.04          |                       | -608.04          |                       |
| <b>03</b> | eb-MBE(2) | -753.83          | -135.65               | -676.47          | -58.28                | -690.91          | -72.73                | -658.31          | -40.13                |
|           | eb-MBE(3) | -496.40          | +121.78               | -571.92          | +46.26                | -568.44          | +49.74                | -588.14          | +30.04                |
|           | db-MBE(1) | -486.16          | +132.02               | -618.25          | -0.06                 | -620.39          | -2.21                 | -624.26          | -6.08                 |
|           | db-MBE(2) | -449.85          | +168.33               | -609.37          | +8.81                 | -611.77          | +6.41                 | -617.20          | +0.98                 |
|           | db-MBE(3) | -691.35          | -73.17                | -621.49          | -3.31                 | -622.22          | -4.04                 | -617.68          | +0.50                 |
|           | supermol. | -618.18          |                       | -618.18          |                       | -618.18          |                       | -618.18          |                       |
| <b>04</b> | eb-MBE(2) | -751.61          | -146.57               | -673.44          | -68.40                | -680.89          | -75.85                | -644.39          | -39.35                |
|           | eb-MBE(3) | -494.24          | +110.80               | -560.73          | +44.30                | -561.40          | +43.64                | -580.86          | +24.17                |
|           | db-MBE(1) | -481.29          | +123.74               | -603.79          | +1.25                 | -604.85          | +0.19                 | -607.17          | -2.14                 |
|           | db-MBE(2) | -448.80          | +156.24               | -596.54          | +8.49                 | -599.84          | +5.20                 | -605.12          | -0.08                 |
|           | db-MBE(3) | -690.55          | -85.51                | -608.55          | -3.51                 | -608.05          | -3.01                 | -603.41          | +1.63                 |
|           | supermol. | -605.04          |                       | -605.04          |                       | -605.04          |                       | -605.04          |                       |
| <b>05</b> | eb-MBE(2) | -734.49          | -149.41               | -643.24          | -58.15                | -658.85          | -73.76                | -627.68          | -42.60                |
|           | eb-MBE(3) | -463.31          | +121.77               | -539.76          | +45.33                | -536.41          | +48.67                | -554.36          | +30.72                |
|           | db-MBE(1) | -467.57          | +117.52               | -581.33          | +3.75                 | -582.85          | +2.24                 | -585.36          | -0.27                 |
|           | db-MBE(2) | -417.84          | +167.24               | -577.80          | +7.29                 | -579.27          | +5.82                 | -584.70          | +0.39                 |
|           | db-MBE(3) | -661.43          | -76.34                | -586.38          | -1.30                 | -587.59          | -2.50                 | -583.68          | +1.40                 |
|           | supermol. | -585.08          |                       | -585.08          |                       | -585.08          |                       | -585.08          |                       |

Table S6: (Continued) Total interaction energies  $E_{\text{int}}^{\text{xx-MBE}(n)}$  (PBE0/TZP, in kJ/mol) of ten isomers of  $\text{F}^-(\text{H}_2\text{O})_{10}$  relative to the lowest-energy isomer as calculated with the energy-based MBE [eb-MBE( $n$ ),  $n = 2, 3$ ] as well as the density-based MBE [db-MBE( $n$ ),  $n = 1, 2, 3$ ]. The total interaction energies from supermolecular calculations as well as the errors in the total interaction energies compared to the supermolecular calculation  $\Delta_{\text{int}}^{\text{xx-MBE}(n)}$ , are given as reference. Included are results from both the isolated MBEs (“iso”) and the embedded MBEs using point-charge embedding (“PC”) as well as using frozen-density embedding with the unrelaxed frozen densities of the isolated fragments (“FDE”) and a relaxed frozen density obtained using freeze-and-thaw cycles (“FDE-ft”). All values are given in kJ/mol.

|           |           | iso              |                       | PC               |                       | FDE              |                       | FDE-ft           |                       |
|-----------|-----------|------------------|-----------------------|------------------|-----------------------|------------------|-----------------------|------------------|-----------------------|
|           |           | $E_{\text{int}}$ | $\Delta_{\text{int}}$ | $E_{\text{int}}$ | $\Delta_{\text{int}}$ | $E_{\text{int}}$ | $\Delta_{\text{int}}$ | $E_{\text{int}}$ | $\Delta_{\text{int}}$ |
| <b>06</b> | eb-MBE(2) | -788.48          | -174.44               | -677.07          | -63.02                | -696.09          | -82.04                | -655.94          | -41.90                |
|           | eb-MBE(3) | -476.79          | +137.26               | -567.68          | +46.36                | -559.71          | +54.34                | -585.62          | +28.43                |
|           | db-MBE(1) | -474.39          | +139.66               | -613.39          | +0.66                 | -616.67          | -2.62                 | -620.54          | -6.49                 |
|           | db-MBE(2) | -421.96          | +192.09               | -605.60          | +8.45                 | -606.07          | +7.98                 | -612.80          | +1.25                 |
|           | db-MBE(3) | -715.00          | -100.95               | -616.95          | -2.91                 | -619.90          | -5.85                 | -613.78          | +0.27                 |
|           | supermol. | -614.05          |                       | -614.05          |                       | -614.05          |                       | -614.05          |                       |
| <b>07</b> | eb-MBE(2) | -731.65          | -147.12               | -649.18          | -64.65                | -657.25          | -72.72                | -622.57          | -38.04                |
|           | eb-MBE(3) | -469.10          | +115.44               | -541.72          | +42.81                | -540.38          | +44.16                | -559.89          | +24.65                |
|           | db-MBE(1) | -461.18          | +123.35               | -584.32          | +0.21                 | -584.47          | +0.06                 | -587.35          | -2.82                 |
|           | db-MBE(2) | -426.79          | +157.74               | -577.26          | +7.27                 | -579.24          | +5.30                 | -584.15          | +0.38                 |
|           | db-MBE(3) | -681.74          | -97.21                | -586.99          | -2.46                 | -587.70          | -3.17                 | -583.12          | +1.42                 |
|           | supermol. | -584.53          |                       | -584.53          |                       | -584.53          |                       | -584.53          |                       |
| <b>08</b> | eb-MBE(2) | -737.45          | -158.93               | -641.04          | -62.52                | -654.72          | -76.19                | -618.68          | -40.16                |
|           | eb-MBE(3) | -446.68          | +131.84               | -530.62          | +47.90                | -526.33          | +52.19                | -549.91          | +28.61                |
|           | db-MBE(1) | -461.10          | +117.42               | -585.38          | -6.85                 | -586.24          | -7.72                 | -589.60          | -11.07                |
|           | db-MBE(2) | -404.65          | +173.87               | -570.77          | +7.75                 | -571.92          | +6.60                 | -577.45          | +1.08                 |
|           | db-MBE(3) | -662.92          | -84.40                | -581.42          | -2.89                 | -582.94          | -4.42                 | -577.97          | +0.55                 |
|           | supermol. | -578.52          |                       | -578.52          |                       | -578.52          |                       | -578.52          |                       |
| <b>09</b> | eb-MBE(2) | -749.27          | -173.76               | -646.36          | -70.85                | -658.17          | -82.66                | -623.06          | -47.55                |
|           | eb-MBE(3) | -428.12          | +147.39               | -514.70          | +60.80                | -513.37          | +62.13                | -538.04          | +37.47                |
|           | db-MBE(1) | -461.83          | +113.68               | -579.25          | -3.74                 | -580.22          | -4.72                 | -583.98          | -8.48                 |
|           | db-MBE(2) | -391.06          | +184.44               | -564.47          | +11.04                | -568.80          | +6.70                 | -574.78          | +0.72                 |
|           | db-MBE(3) | -625.28          | -49.78                | -579.61          | -4.10                 | -578.93          | -3.42                 | -574.31          | +1.20                 |
|           | supermol. | -575.50          |                       | -575.50          |                       | -575.50          |                       | -575.50          |                       |
| <b>10</b> | eb-MBE(2) | -780.94          | -168.72               | -686.95          | -74.73                | -702.19          | -89.97                | -658.38          | -46.16                |
|           | eb-MBE(3) | -470.74          | +141.48               | -562.04          | +50.17                | -556.65          | +55.57                | -583.73          | +28.48                |
|           | db-MBE(1) | -475.02          | +137.19               | -614.68          | -2.47                 | -614.39          | -2.18                 | -617.70          | -5.49                 |
|           | db-MBE(2) | -424.66          | +187.56               | -605.39          | +6.82                 | -606.87          | +5.34                 | -612.66          | -0.45                 |
|           | db-MBE(3) | -691.41          | -79.20                | -616.45          | -4.24                 | -618.86          | -6.64                 | -612.53          | -0.32                 |
|           | supermol. | -612.21          |                       | -612.21          |                       | -612.21          |                       | -612.21          |                       |

Table S7: Interaction energies (PBE0/TZP, in kJ/mol) of ten isomers of  $F^-(H_2O)_{10}$  relative to the lowest-energy isomer calculated with the energy-based MBE [eb-MBE( $n$ ),  $n = 2, 3$ ] as well as the density-based MBE [db-MBE( $n$ ),  $n = 1, 2, 3$ ]. The relative interaction energies from supermolecular calculations are given as reference. Included are results from the isolated MBEs (“iso”) as well as embedded MBEs using point charges (“PC”). All values are given in kJ/mol.

|     | isomer    | $E_{\text{int,rel}}^{\text{super}}$ | $E_{\text{int,rel}}^{\text{eb-MBE}(n)}$ |         | $E_{\text{int,rel}}^{\text{db-MBE}(n)}$ |         |         |
|-----|-----------|-------------------------------------|-----------------------------------------|---------|-----------------------------------------|---------|---------|
|     |           |                                     | $n = 2$                                 | $n = 3$ | $n = 1$                                 | $n = 2$ | $n = 3$ |
| iso | <b>03</b> | 0.00                                | 0.00                                    | 0.00    | 0.00                                    | 0.00    | 0.00    |
|     | <b>06</b> | 4.13                                | -34.65                                  | 19.62   | 11.77                                   | 27.89   | -23.65  |
|     | <b>10</b> | 5.97                                | -27.10                                  | 25.67   | 11.14                                   | 25.19   | -0.07   |
|     | <b>02</b> | 10.15                               | -11.61                                  | 15.48   | -1.09                                   | 7.41    | -0.15   |
|     | <b>04</b> | 13.14                               | 2.22                                    | 2.16    | 4.87                                    | 1.05    | 0.80    |
|     | <b>01</b> | 15.93                               | -18.04                                  | 21.35   | -12.19                                  | 14.69   | 3.97    |
|     | <b>05</b> | 33.10                               | 19.34                                   | 33.09   | 18.59                                   | 32.01   | 29.92   |
|     | <b>07</b> | 33.65                               | 22.18                                   | 27.31   | 24.98                                   | 23.06   | 9.60    |
|     | <b>08</b> | 39.66                               | 16.38                                   | 49.72   | 25.06                                   | 45.20   | 28.43   |
|     | <b>09</b> | 42.68                               | 4.57                                    | 68.28   | 24.33                                   | 58.78   | 66.06   |
| PC  | <b>03</b> | 0.00                                | 0.00                                    | 0.00    | 0.00                                    | 0.00    | 0.00    |
|     | <b>06</b> | 4.13                                | -0.60                                   | 4.24    | 4.86                                    | 3.77    | 4.54    |
|     | <b>10</b> | 5.97                                | -10.48                                  | 9.88    | 3.56                                    | 3.98    | 5.04    |
|     | <b>02</b> | 10.15                               | 4.57                                    | 11.76   | 7.65                                    | 9.25    | 9.09    |
|     | <b>04</b> | 13.14                               | 3.03                                    | 11.19   | 14.46                                   | 12.83   | 12.94   |
|     | <b>01</b> | 15.93                               | 4.09                                    | 17.89   | 11.20                                   | 15.12   | 14.65   |
|     | <b>05</b> | 33.10                               | 33.23                                   | 32.17   | 36.92                                   | 31.57   | 35.11   |
|     | <b>07</b> | 33.65                               | 27.28                                   | 30.20   | 33.93                                   | 32.11   | 34.50   |
|     | <b>08</b> | 39.66                               | 35.43                                   | 41.30   | 32.87                                   | 38.60   | 40.07   |
|     | <b>09</b> | 42.68                               | 30.11                                   | 57.22   | 39.00                                   | 44.91   | 41.88   |

Table S8: Interaction energies (PBE0/TZP, in kJ/mol) of ten isomers of  $F^-(H_2O)_{10}$  relative to the lowest-energy isomer calculated with the energy-based MBE [eb-MBE( $n$ ),  $n = 2, 3$ ] as well as the density-based MBE [db-MBE( $n$ ),  $n = 1, 2, 3$ ]. The relative interaction energies from supermolecular calculations are given as reference. Included are results for the frozen-density embedded MBEs using the unrelaxed frozen densities of the isolated fragments (“FDE”) and using a relaxed frozen density obtained using three freeze-and-thaw cycles (“FDE-ft”). All values are given in kJ/mol.

|        |           | $E_{\text{int,rel}}^{\text{super}}$ | $E_{\text{int,rel}}^{\text{eb-MBE}(n)}$ |         | $E_{\text{int,rel}}^{\text{db-MBE}(n)}$ |         |         |
|--------|-----------|-------------------------------------|-----------------------------------------|---------|-----------------------------------------|---------|---------|
|        | isomer    |                                     | $n = 2$                                 | $n = 3$ | $n = 1$                                 | $n = 2$ | $n = 3$ |
| FDE    | <b>03</b> | 0.00                                | 0.00                                    | 0.00    | 0.00                                    | 0.00    | 0.00    |
|        | <b>06</b> | 4.13                                | -5.18                                   | 8.73    | 3.72                                    | 5.70    | 2.33    |
|        | <b>10</b> | 5.97                                | -11.28                                  | 11.79   | 6.00                                    | 4.90    | 3.37    |
|        | <b>02</b> | 10.15                               | 6.07                                    | 12.44   | 8.06                                    | 9.40    | 9.13    |
|        | <b>04</b> | 13.14                               | 10.02                                   | 7.04    | 15.54                                   | 11.93   | 14.18   |
|        | <b>01</b> | 15.93                               | 3.49                                    | 18.37   | 12.04                                   | 15.71   | 14.81   |
|        | <b>05</b> | 33.10                               | 32.06                                   | 32.03   | 37.54                                   | 32.50   | 34.63   |
|        | <b>07</b> | 33.65                               | 33.66                                   | 28.06   | 35.92                                   | 32.53   | 34.52   |
|        | <b>08</b> | 39.66                               | 36.19                                   | 42.11   | 34.15                                   | 39.85   | 39.28   |
|        | <b>09</b> | 42.68                               | 32.74                                   | 55.07   | 40.17                                   | 42.97   | 43.29   |
| FDE-ft | <b>03</b> | 0.00                                | 0.00                                    | 0.00    | 0.00                                    | 0.00    | 0.00    |
|        | <b>06</b> | 4.13                                | 2.37                                    | 2.52    | 3.72                                    | 4.40    | 3.90    |
|        | <b>10</b> | 5.97                                | -0.07                                   | 4.41    | 6.56                                    | 4.54    | 5.14    |
|        | <b>02</b> | 10.15                               | 5.90                                    | 11.05   | 8.88                                    | 9.17    | 9.28    |
|        | <b>04</b> | 13.14                               | 13.92                                   | 7.28    | 17.09                                   | 12.08   | 14.27   |
|        | <b>01</b> | 15.93                               | 8.79                                    | 16.27   | 13.96                                   | 15.51   | 15.02   |
|        | <b>05</b> | 33.10                               | 30.63                                   | 33.78   | 38.91                                   | 32.51   | 33.99   |
|        | <b>07</b> | 33.65                               | 35.74                                   | 28.26   | 36.91                                   | 33.05   | 34.56   |
|        | <b>08</b> | 39.66                               | 39.63                                   | 38.23   | 34.67                                   | 39.76   | 39.71   |
|        | <b>09</b> | 42.68                               | 35.25                                   | 50.10   | 40.28                                   | 42.42   | 43.37   |

## S2.1 $\text{OH}^-(\text{H}_2\text{O})_N$ ( $N = 3, 4, 5$ )

The following tables S9 to S14 contain additional raw data for the calculations presented in Section 3.3 of the main text.

Table S9: Total interaction energies  $E_{\text{int}}^{\text{xx-MBE}(n)}$ (PBE0/TZP, in kJ/mol) of six isomers of  $\text{OH}^-(\text{H}_2\text{O})_3$  relative to the lowest-energy isomer as calculated with the energy-based MBE [eb-MBE( $n$ ),  $n = 2, 3$ ] as well as the density-based MBE [db-MBE( $n$ ),  $n = 1, 2, 3$ ]. The total interaction energies from supermolecular calculations as well as the errors in the total interaction energies compared to the supermolecular calculation  $\Delta_{\text{int}}^{\text{xx-MBE}(n)}$ , are given as reference. Included are results from both the isolated MBEs (“iso”) and the embedded MBEs using point-charge embedding (“PC”) as well as using frozen-density embedding with the unrelaxed frozen densities of the isolated fragments (“FDE”) and a relaxed frozen density obtained using freeze-and-thaw cycles (“FDE-ft”). All values are given in kJ/mol.

|          |           | iso              |                       | PC               |                       | FDE              |                       | FDE-ft           |                       |
|----------|-----------|------------------|-----------------------|------------------|-----------------------|------------------|-----------------------|------------------|-----------------------|
|          |           | $E_{\text{int}}$ | $\Delta_{\text{int}}$ | $E_{\text{int}}$ | $\Delta_{\text{int}}$ | $E_{\text{int}}$ | $\Delta_{\text{int}}$ | $E_{\text{int}}$ | $\Delta_{\text{int}}$ |
| <b>1</b> | eb-MBE(2) | -395.78          | -37.02                | -379.20          | -20.44                | -383.06          | -24.30                | -365.20          | -6.44                 |
|          | eb-MBE(3) | -356.72          | +2.04                 | -359.82          | -1.05                 | -360.45          | -1.69                 | -360.66          | -1.89                 |
|          | db-MBE(1) | -177.44          | +181.32               | -323.20          | +35.56                | -324.81          | +33.95                | -330.23          | +28.53                |
|          | db-MBE(2) | -320.26          | +38.50                | -355.03          | +3.73                 | -356.26          | +2.50                 | -357.52          | +1.24                 |
|          | db-MBE(3) | -374.89          | -16.13                | -360.08          | -1.32                 | -359.68          | -0.92                 | -359.14          | -0.38                 |
|          | supermol. | -358.76          |                       | -358.76          |                       | -358.76          |                       | -358.76          |                       |
| <b>2</b> | eb-MBE(2) | -415.94          | -66.98                | -386.75          | -37.78                | -391.07          | -42.10                | -365.58          | -16.62                |
|          | eb-MBE(3) | -342.60          | +6.36                 | -345.77          | +3.20                 | -345.18          | +3.79                 | -348.50          | +0.47                 |
|          | db-MBE(1) | -203.46          | +145.51               | -328.88          | +20.08                | -329.69          | +19.28                | -332.58          | +16.38                |
|          | db-MBE(2) | -325.31          | +23.66                | -347.50          | +1.46                 | -347.55          | +1.41                 | -348.32          | +0.65                 |
|          | db-MBE(3) | -354.72          | -5.76                 | -349.79          | -0.83                 | -349.98          | -1.02                 | -349.27          | -0.30                 |
|          | supermol. | -348.97          |                       | -348.97          |                       | -348.97          |                       | -348.97          |                       |
| <b>3</b> | eb-MBE(2) | -417.40          | -67.53                | -388.92          | -39.05                | -393.13          | -43.27                | -368.04          | -18.18                |
|          | eb-MBE(3) | -343.69          | +6.17                 | -346.60          | +3.27                 | -345.96          | +3.91                 | -349.25          | +0.62                 |
|          | db-MBE(1) | -199.02          | +150.85               | -327.85          | +22.02                | -328.78          | +21.08                | -331.62          | +18.25                |
|          | db-MBE(2) | -327.48          | +22.39                | -348.29          | +1.57                 | -348.29          | +1.58                 | -349.00          | +0.86                 |
|          | db-MBE(3) | -354.59          | -4.73                 | -350.31          | -0.45                 | -350.57          | -0.70                 | -349.81          | +0.06                 |
|          | supermol. | -349.87          |                       | -349.87          |                       | -349.87          |                       | -349.87          |                       |
| <b>4</b> | eb-MBE(2) | -414.69          | -67.88                | -385.67          | -38.85                | -389.41          | -42.59                | -363.30          | -16.48                |
|          | eb-MBE(3) | -340.14          | +6.68                 | -343.31          | +3.51                 | -342.53          | +4.28                 | -346.01          | +0.81                 |
|          | db-MBE(1) | -203.65          | +143.17               | -326.98          | +19.84                | -328.14          | +18.68                | -331.12          | +15.70                |
|          | db-MBE(2) | -321.69          | +25.13                | -344.98          | +1.84                 | -344.43          | +2.39                 | -345.38          | +1.44                 |
|          | db-MBE(3) | -351.76          | -4.94                 | -347.01          | -0.20                 | -347.53          | -0.71                 | -346.80          | +0.02                 |
|          | supermol. | -346.82          |                       | -346.82          |                       | -346.82          |                       | -346.82          |                       |
| <b>5</b> | eb-MBE(2) | -398.93          | -58.96                | -370.81          | -30.84                | -376.04          | -36.07                | -354.01          | -14.04                |
|          | eb-MBE(3) | -335.23          | +4.75                 | -337.54          | +2.44                 | -337.36          | +2.61                 | -339.60          | +0.37                 |
|          | db-MBE(1) | -216.31          | +123.67               | -327.41          | +12.56                | -327.29          | +12.68                | -330.53          | +9.44                 |
|          | db-MBE(2) | -316.05          | +23.93                | -337.63          | +2.34                 | -338.01          | +1.97                 | -338.70          | +1.27                 |
|          | db-MBE(3) | -344.93          | -4.96                 | -340.80          | -0.82                 | -340.86          | -0.88                 | -340.30          | -0.33                 |
|          | supermol. | -339.97          |                       | -339.97          |                       | -339.97          |                       | -339.97          |                       |
| <b>6</b> | eb-MBE(2) | -412.87          | -69.17                | -381.73          | -38.02                | -385.91          | -42.21                | -360.00          | -16.29                |
|          | eb-MBE(3) | -336.60          | +7.10                 | -340.43          | +3.27                 | -339.29          | +4.41                 | -342.91          | +0.79                 |
|          | db-MBE(1) | -203.64          | +140.07               | -323.42          | +20.29                | -324.85          | +18.86                | -327.97          | +15.74                |
|          | db-MBE(2) | -317.89          | +25.81                | -342.08          | +1.62                 | -341.48          | +2.23                 | -342.48          | +1.23                 |
|          | db-MBE(3) | -349.06          | -5.36                 | -343.69          | +0.02                 | -344.39          | -0.68                 | -343.69          | +0.02                 |
|          | supermol. | -343.71          |                       | -343.71          |                       | -343.71          |                       | -343.71          |                       |

Table S10: Total interaction energies  $E_{\text{int}}^{\text{xx-MBE}(n)}$  (PBE0/TZP, in kJ/mol) of four isomers of  $\text{OH}^-(\text{H}_2\text{O})_4$  relative to the lowest-energy isomer as calculated with the energy-based MBE [eb-MBE( $n$ ),  $n = 2, 3$ ] as well as the density-based MBE [db-MBE( $n$ ),  $n = 1, 2, 3$ ]. The total interaction energies from supermolecular calculations as well as the errors in the total interaction energies compared to the supermolecular calculation  $\Delta_{\text{int}}^{\text{xx-MBE}(n)}$ , are given as reference. Included are results from both the isolated MBEs (“iso”) and the embedded MBEs using point-charge embedding (“PC”) as well as using frozen-density embedding with the unrelaxed frozen densities of the isolated fragments (“FDE”) and a relaxed frozen density obtained using freeze-and-thaw cycles (“FDE-ft”). All values are given in kJ/mol.

|          |           | iso              |                       | PC               |                       | FDE              |                       | FDE-ft           |                       |
|----------|-----------|------------------|-----------------------|------------------|-----------------------|------------------|-----------------------|------------------|-----------------------|
|          |           | $E_{\text{int}}$ | $\Delta_{\text{int}}$ | $E_{\text{int}}$ | $\Delta_{\text{int}}$ | $E_{\text{int}}$ | $\Delta_{\text{int}}$ | $E_{\text{int}}$ | $\Delta_{\text{int}}$ |
| <b>1</b> | eb-MBE(2) | -497.56          | -73.61                | -459.64          | -35.69                | -467.61          | -43.66                | -438.10          | -14.16                |
|          | eb-MBE(3) | -413.37          | +10.58                | -420.90          | +3.05                 | -420.73          | +3.22                 | -424.56          | -0.61                 |
|          | db-MBE(1) | -265.99          | +157.95               | -405.29          | +18.65                | -407.02          | +16.93                | -411.09          | +12.86                |
|          | db-MBE(2) | -374.25          | +49.69                | -418.70          | +5.24                 | -420.18          | +3.77                 | -421.85          | +2.10                 |
|          | db-MBE(3) | -448.68          | -24.73                | -425.99          | -2.04                 | -425.49          | -1.54                 | -424.26          | -0.31                 |
|          | supermol. | -423.95          |                       | -423.95          |                       | -423.95          |                       | -423.95          |                       |
| <b>2</b> | eb-MBE(2) | -502.54          | -79.09                | -465.70          | -42.25                | -472.07          | -48.62                | -439.45          | -16.00                |
|          | eb-MBE(3) | -407.19          | +16.25                | -419.45          | +4.00                 | -419.19          | +4.26                 | -424.77          | -1.33                 |
|          | db-MBE(1) | -251.02          | +172.43               | -399.88          | +23.57                | -401.73          | +21.72                | -405.31          | +18.14                |
|          | db-MBE(2) | -362.53          | +60.92                | -419.31          | +4.14                 | -419.98          | +3.46                 | -421.89          | +1.55                 |
|          | db-MBE(3) | -461.78          | -38.33                | -425.28          | -1.83                 | -425.38          | -1.93                 | -423.66          | -0.21                 |
|          | supermol. | -423.45          |                       | -423.45          |                       | -423.45          |                       | -423.45          |                       |
| <b>3</b> | eb-MBE(2) | -482.40          | -67.04                | -447.40          | -32.04                | -453.24          | -37.88                | -426.49          | -11.13                |
|          | eb-MBE(3) | -396.07          | +19.29                | -410.56          | +4.80                 | -409.72          | +5.65                 | -415.76          | -0.40                 |
|          | db-MBE(1) | -231.33          | +184.03               | -385.75          | +29.62                | -386.92          | +28.44                | -392.24          | +23.12                |
|          | db-MBE(2) | -351.16          | +64.20                | -412.26          | +3.11                 | -412.60          | +2.76                 | -414.53          | +0.84                 |
|          | db-MBE(3) | -456.26          | -40.90                | -416.92          | -1.56                 | -417.28          | -1.91                 | -415.66          | -0.30                 |
|          | supermol. | -415.36          |                       | -415.36          |                       | -415.36          |                       | -415.36          |                       |
| <b>4</b> | eb-MBE(2) | -444.39          | -28.16                | -425.00          | -8.77                 | -429.68          | -13.45                | -413.71          | +2.52                 |
|          | eb-MBE(3) | -397.15          | +19.08                | -414.03          | +2.20                 | -413.74          | +2.49                 | -418.25          | -2.02                 |
|          | db-MBE(1) | -183.18          | +233.05               | -364.93          | +51.30                | -366.97          | +49.26                | -375.53          | +40.70                |
|          | db-MBE(2) | -328.92          | +87.31                | -411.69          | +4.54                 | -412.07          | +4.16                 | -415.06          | +1.17                 |
|          | db-MBE(3) | -470.21          | -53.98                | -417.69          | -1.46                 | -418.06          | -1.83                 | -416.16          | +0.07                 |
|          | supermol. | -416.23          |                       | -416.23          |                       | -416.23          |                       | -416.23          |                       |

Table S11: Total interaction energies  $E_{\text{int}}^{\text{xx-MBE}(n)}$  (PBE0/TZP, in kJ/mol) of four isomers of  $\text{OH}^-(\text{H}_2\text{O})_5$  relative to the lowest-energy isomer as calculated with the energy-based MBE [eb-MBE( $n$ ),  $n = 2, 3$ ] as well as the density-based MBE [db-MBE( $n$ ),  $n = 1, 2, 3$ ]. The total interaction energies from supermolecular calculations as well as the errors in the total interaction energies compared to the supermolecular calculation  $\Delta_{\text{int}}^{\text{xx-MBE}(n)}$ , are given as reference. Included are results from both the isolated MBEs (“iso”) and the embedded MBEs using point-charge embedding (“PC”) as well as using frozen-density embedding with the unrelaxed frozen densities of the isolated fragments (“FDE”) and a relaxed frozen density obtained using freeze-and-thaw cycles (“FDE-ft”). All values are given in kJ/mol.

|          |           | iso              |                       | PC               |                       | FDE              |                       | FDE-ft           |                       |
|----------|-----------|------------------|-----------------------|------------------|-----------------------|------------------|-----------------------|------------------|-----------------------|
|          |           | $E_{\text{int}}$ | $\Delta_{\text{int}}$ | $E_{\text{int}}$ | $\Delta_{\text{int}}$ | $E_{\text{int}}$ | $\Delta_{\text{int}}$ | $E_{\text{int}}$ | $\Delta_{\text{int}}$ |
| <b>1</b> | eb-MBE(2) | -574.72          | -80.83                | -531.25          | -37.36                | -541.91          | -48.02                | -508.71          | -14.82                |
|          | eb-MBE(3) | -476.91          | +16.98                | -491.34          | +2.55                 | -490.52          | +3.37                 | -495.73          | -1.84                 |
|          | db-MBE(1) | -309.59          | +184.30               | -472.15          | +21.74                | -475.14          | +18.75                | -479.88          | +14.02                |
|          | db-MBE(2) | -420.50          | +73.39                | -487.55          | +6.34                 | -490.08          | +3.81                 | -492.54          | +1.35                 |
|          | db-MBE(3) | -546.58          | -52.69                | -497.61          | -3.72                 | -496.95          | -3.05                 | -494.84          | -0.95                 |
|          | supermol. | -493.89          |                       | -493.89          |                       | -493.89          |                       | -493.89          |                       |
| <b>2</b> | eb-MBE(2) | -583.72          | -94.30                | -534.94          | -45.52                | -544.59          | -55.17                | -504.30          | -14.88                |
|          | eb-MBE(3) | -458.15          | +31.27                | -484.36          | +5.06                 | -484.51          | +4.91                 | -493.24          | -3.82                 |
|          | db-MBE(1) | -300.80          | +188.62               | -465.61          | +23.80                | -467.70          | +21.72                | -471.59          | +17.83                |
|          | db-MBE(2) | -384.80          | +104.62               | -483.37          | +6.04                 | -485.24          | +4.18                 | -488.12          | +1.30                 |
|          | db-MBE(3) | -572.26          | -82.85                | -493.05          | -3.63                 | -492.81          | -3.39                 | -489.98          | -0.57                 |
|          | supermol. | -489.42          |                       | -489.42          |                       | -489.42          |                       | -489.42          |                       |
| <b>3</b> | eb-MBE(2) | -593.81          | -114.89               | -531.00          | -52.07                | -540.70          | -61.77                | -500.57          | -21.65                |
|          | eb-MBE(3) | -449.26          | +29.67                | -469.01          | +9.92                 | -467.42          | +11.51                | -477.48          | +1.45                 |
|          | db-MBE(1) | -340.07          | +138.86               | -472.74          | +6.19                 | -474.50          | +4.43                 | -477.92          | +1.01                 |
|          | db-MBE(2) | -405.95          | +72.98                | -472.46          | +6.47                 | -474.23          | +4.70                 | -476.63          | +2.30                 |
|          | db-MBE(3) | -524.36          | -45.43                | -481.93          | -3.00                 | -481.58          | -2.65                 | -479.34          | -0.41                 |
|          | supermol. | -478.93          |                       | -478.93          |                       | -478.93          |                       | -478.93          |                       |
| <b>4</b> | eb-MBE(2) | -526.00          | -58.07                | -496.46          | -28.53                | -499.43          | -31.50                | -474.61          | -6.68                 |
|          | eb-MBE(3) | -438.66          | +29.27                | -463.01          | +4.92                 | -463.19          | +4.74                 | -469.58          | -1.65                 |
|          | db-MBE(1) | -258.66          | +209.27               | -437.05          | +30.88                | -437.63          | +30.30                | -444.41          | +23.52                |
|          | db-MBE(2) | -367.89          | +100.04               | -463.21          | +4.72                 | -464.23          | +3.70                 | -466.48          | +1.45                 |
|          | db-MBE(3) | -555.34          | -87.41                | -469.89          | -1.96                 | -469.94          | -2.01                 | -467.88          | +0.05                 |
|          | supermol. | -467.93          |                       | -467.93          |                       | -467.93          |                       | -467.93          |                       |

Table S12: Interaction energies (PBE0/TZP, in kJ/mol) of six isomers of  $\text{OH}^-(\text{H}_2\text{O})_3$  relative to the lowest-energy isomer calculated with the energy-based MBE [eb-MBE( $n$ ),  $n = 2, 3$ ] as well as the density-based MBE [db-MBE( $n$ ),  $n = 1, 2, 3$ ]. The relative interaction energies from supermolecular calculations are given as reference. Included are results from both the isolated MBEs (“iso”) and the embedded MBEs using point-charge embedding (“PC”) as well as using frozen-density embedding with the unrelaxed frozen densities of the isolated fragments (“FDE”) and a relaxed frozen density obtained using freeze-and-thaw cycles (“FDE-ft”). All values are given in kJ/mol.

|        | isomer   | $E_{\text{int,rel}}^{\text{super}}$ | $E_{\text{int,rel}}^{\text{eb-MBE}(n)}$ |         | $E_{\text{int,rel}}^{\text{db-MBE}(n)}$ |         |         |
|--------|----------|-------------------------------------|-----------------------------------------|---------|-----------------------------------------|---------|---------|
|        |          |                                     | $n = 2$                                 | $n = 3$ | $n = 1$                                 | $n = 2$ | $n = 3$ |
| iso    | <b>1</b> | 0.00                                | 0.00                                    | 0.00    | 0.00                                    | 0.00    | 0.00    |
|        | <b>3</b> | 8.90                                | -21.61                                  | 13.03   | -21.58                                  | -7.22   | 20.29   |
|        | <b>2</b> | 9.80                                | -20.16                                  | 14.12   | -26.02                                  | -5.05   | 20.16   |
|        | <b>4</b> | 11.94                               | -18.91                                  | 16.58   | -26.21                                  | -1.43   | 23.13   |
|        | <b>6</b> | 15.05                               | -17.09                                  | 20.12   | -26.20                                  | 2.36    | 25.82   |
|        | <b>5</b> | 18.79                               | -3.15                                   | 21.50   | -38.87                                  | 4.21    | 29.95   |
| PC     | <b>1</b> | 0.00                                | 0.00                                    | 0.00    | 0.00                                    | 0.00    | 0.00    |
|        | <b>3</b> | 8.90                                | -9.72                                   | 13.22   | -4.65                                   | 6.74    | 9.77    |
|        | <b>2</b> | 9.80                                | -7.55                                   | 14.05   | -5.68                                   | 7.53    | 10.29   |
|        | <b>4</b> | 11.94                               | -6.47                                   | 16.50   | -3.78                                   | 10.05   | 13.07   |
|        | <b>6</b> | 15.05                               | -2.53                                   | 19.38   | -0.22                                   | 12.95   | 16.39   |
|        | <b>5</b> | 18.79                               | 8.39                                    | 22.28   | -4.21                                   | 17.40   | 19.29   |
| FDE    | <b>1</b> | 0.00                                | 0.00                                    | 0.00    | 0.00                                    | 0.00    | 0.00    |
|        | <b>3</b> | 8.90                                | -10.07                                  | 14.49   | -3.97                                   | 7.97    | 9.11    |
|        | <b>2</b> | 9.80                                | -8.01                                   | 15.27   | -4.88                                   | 8.70    | 9.69    |
|        | <b>4</b> | 11.94                               | -6.34                                   | 17.91   | -3.33                                   | 11.83   | 12.15   |
|        | <b>6</b> | 15.05                               | -2.85                                   | 21.16   | -0.05                                   | 14.77   | 15.28   |
|        | <b>5</b> | 18.79                               | 7.02                                    | 23.09   | -2.48                                   | 18.25   | 18.82   |
| FDE-ft | <b>1</b> | 0.00                                | 0.00                                    | 0.00    | 0.00                                    | 0.00    | 0.00    |
|        | <b>3</b> | 8.90                                | -2.84                                   | 11.41   | -1.39                                   | 8.52    | 9.33    |
|        | <b>2</b> | 9.80                                | -0.38                                   | 12.16   | -2.36                                   | 9.20    | 9.88    |
|        | <b>4</b> | 11.94                               | 1.90                                    | 14.65   | -0.89                                   | 12.14   | 12.34   |
|        | <b>6</b> | 15.05                               | 5.20                                    | 17.74   | 2.26                                    | 15.04   | 15.45   |
|        | <b>5</b> | 18.79                               | 11.19                                   | 21.05   | -0.30                                   | 18.82   | 18.84   |

Table S13: Interaction energies (PBE0/TZP, in kJ/mol) of four isomers of  $\text{OH}^-(\text{H}_2\text{O})_4$  relative to the lowest-energy isomer calculated with the energy-based MBE [eb-MBE( $n$ ),  $n = 2, 3$ ] as well as the density-based MBE [db-MBE( $n$ ),  $n = 1, 2, 3$ ]. The relative interaction energies from supermolecular calculations are given as reference. Included are results from both the isolated MBEs (“iso”) and the embedded MBEs using point-charge embedding (“PC”) as well as using frozen-density embedding with the unrelaxed frozen densities of the isolated fragments (“FDE”) and a relaxed frozen density obtained using freeze-and-thaw cycles (“FDE-ft”). All values are given in kJ/mol.

| isomer |          | $E_{\text{int,rel}}^{\text{super}}$ | $E_{\text{int,rel}}^{\text{eb-MBE}(n)}$ |         | $E_{\text{int,rel}}^{\text{db-MBE}(n)}$ |         |         |
|--------|----------|-------------------------------------|-----------------------------------------|---------|-----------------------------------------|---------|---------|
|        |          |                                     | $n = 2$                                 | $n = 3$ | $n = 1$                                 | $n = 2$ | $n = 3$ |
| iso    | <b>1</b> | 0.00                                | 0.00                                    | 0.00    | 0.00                                    | 0.00    | 0.00    |
|        | <b>2</b> | 0.50                                | -4.98                                   | 6.18    | 14.98                                   | 11.73   | -13.11  |
|        | <b>4</b> | 7.72                                | 53.17                                   | 16.22   | 82.81                                   | 45.33   | -21.54  |
|        | <b>3</b> | 8.58                                | 15.16                                   | 17.30   | 34.67                                   | 23.09   | -7.59   |
| PC     | <b>1</b> | 0.00                                | 0.00                                    | 0.00    | 0.00                                    | 0.00    | 0.00    |
|        | <b>2</b> | 0.50                                | -6.06                                   | 1.45    | 5.42                                    | -0.60   | 0.71    |
|        | <b>4</b> | 7.72                                | 34.64                                   | 6.87    | 40.36                                   | 7.01    | 8.30    |
|        | <b>3</b> | 8.58                                | 12.23                                   | 10.34   | 19.54                                   | 6.45    | 9.06    |
| FDE    | <b>1</b> | 0.00                                | 0.00                                    | 0.00    | 0.00                                    | 0.00    | 0.00    |
|        | <b>2</b> | 0.50                                | -4.46                                   | 1.54    | 5.29                                    | 0.20    | 0.11    |
|        | <b>4</b> | 7.72                                | 37.92                                   | 6.99    | 40.05                                   | 8.11    | 7.43    |
|        | <b>3</b> | 8.58                                | 14.36                                   | 11.01   | 20.10                                   | 7.58    | 8.21    |
| FDE-ft | <b>1</b> | 0.00                                | 0.00                                    | 0.00    | 0.00                                    | 0.00    | 0.00    |
|        | <b>2</b> | 0.50                                | -1.34                                   | -0.22   | 5.78                                    | -0.05   | 0.60    |
|        | <b>4</b> | 7.72                                | 24.39                                   | 6.31    | 35.56                                   | 6.79    | 8.10    |
|        | <b>3</b> | 8.58                                | 11.61                                   | 8.80    | 18.85                                   | 7.32    | 8.59    |

Table S14: Interaction energies (PBE0/TZP, in kJ/mol) of four isomers of  $\text{OH}^-(\text{H}_2\text{O})_5$  relative to the lowest-energy isomer calculated with the energy-based MBE [eb-MBE( $n$ ),  $n = 2, 3$ ] as well as the density-based MBE [db-MBE( $n$ ),  $n = 1, 2, 3$ ]. The relative interaction energies from supermolecular calculations are given as reference. Included are results from both the isolated MBEs (“iso”) and the embedded MBEs using point-charge embedding (“PC”) as well as using frozen-density embedding with the unrelaxed frozen densities of the isolated fragments (“FDE”) and a relaxed frozen density obtained using freeze-and-thaw cycles (“FDE-ft”). All values are given in kJ/mol.

|        | isomer   | $E_{\text{int,rel}}^{\text{super}}$ | $E_{\text{int,rel}}^{\text{eb-MBE}(n)}$ |         | $E_{\text{int,rel}}^{\text{db-MBE}(n)}$ |         |         |
|--------|----------|-------------------------------------|-----------------------------------------|---------|-----------------------------------------|---------|---------|
|        |          |                                     | $n = 2$                                 | $n = 3$ | $n = 1$                                 | $n = 2$ | $n = 3$ |
| iso    | <b>1</b> | 0.00                                | 0.00                                    | 0.00    | 0.00                                    | 0.00    | 0.00    |
|        | <b>2</b> | 4.47                                | -9.00                                   | 18.76   | 8.80                                    | 35.70   | -25.68  |
|        | <b>3</b> | 14.96                               | -19.09                                  | 27.65   | -30.47                                  | 14.55   | 22.22   |
|        | <b>4</b> | 25.96                               | 48.72                                   | 38.25   | 50.93                                   | 52.61   | -8.76   |
| PC     | <b>1</b> | 0.00                                | 0.00                                    | 0.00    | 0.00                                    | 0.00    | 0.00    |
|        | <b>2</b> | 4.47                                | -3.68                                   | 6.99    | 6.53                                    | 4.18    | 4.56    |
|        | <b>3</b> | 14.96                               | 0.26                                    | 22.33   | -0.59                                   | 15.09   | 15.68   |
|        | <b>4</b> | 25.96                               | 34.79                                   | 28.33   | 35.10                                   | 24.34   | 27.72   |
| FDE    | <b>1</b> | 0.00                                | 0.00                                    | 0.00    | 0.00                                    | 0.00    | 0.00    |
|        | <b>2</b> | 4.47                                | -2.68                                   | 6.01    | 7.44                                    | 4.84    | 4.13    |
|        | <b>3</b> | 14.96                               | 1.21                                    | 23.10   | 0.64                                    | 15.85   | 15.36   |
|        | <b>4</b> | 25.96                               | 42.48                                   | 27.33   | 37.52                                   | 25.85   | 27.01   |
| FDE-ft | <b>1</b> | 0.00                                | 0.00                                    | 0.00    | 0.00                                    | 0.00    | 0.00    |
|        | <b>2</b> | 4.47                                | 4.41                                    | 2.49    | 8.28                                    | 4.42    | 4.86    |
|        | <b>3</b> | 14.96                               | 8.13                                    | 18.25   | 1.96                                    | 15.91   | 15.50   |
|        | <b>4</b> | 25.96                               | 34.10                                   | 26.16   | 35.46                                   | 26.06   | 26.96   |

## S2.2 $\text{H}_3\text{O}^+(\text{H}_2\text{O})_N$ ( $N = 3, 4, 5$ )

The following tables S15 to S20 contain additional raw data for the calculations presented in Section 3.4 of the main text.

Table S15: Total interaction energies  $E_{\text{int}}^{\text{xx-MBE}(n)}$  (PBE0/TZP, in kJ/mol) of four isomers of  $\text{H}_3\text{O}^+(\text{H}_2\text{O})_3$  relative to the lowest-energy isomer as calculated with the energy-based MBE [eb-MBE( $n$ ),  $n = 2, 3$ ] as well as the density-based MBE [db-MBE( $n$ ),  $n = 1, 2, 3$ ]. The total interaction energies from supermolecular calculations as well as the errors in the total interaction energies compared to the supermolecular calculation  $\Delta_{\text{int}}^{\text{xx-MBE}(n)}$ , are given as reference. Included are results from both the isolated MBEs (“iso”) and the embedded MBEs using point-charge embedding (“PC”) as well as using frozen-density embedding with the unrelaxed frozen densities of the isolated fragments (“FDE”) and a relaxed frozen density obtained using freeze-and-thaw cycles (“FDE-ft”). All values are given in kJ/mol.

|          |           | iso              |                       | PC               |                       | FDE              |                       | FDE-ft           |                       |
|----------|-----------|------------------|-----------------------|------------------|-----------------------|------------------|-----------------------|------------------|-----------------------|
|          |           | $E_{\text{int}}$ | $\Delta_{\text{int}}$ | $E_{\text{int}}$ | $\Delta_{\text{int}}$ | $E_{\text{int}}$ | $\Delta_{\text{int}}$ | $E_{\text{int}}$ | $\Delta_{\text{int}}$ |
| <b>1</b> | eb-MBE(2) | -399.39          | +4.81                 | -402.80          | +1.40                 | -402.26          | +1.95                 | -400.94          | +3.26                 |
|          | eb-MBE(3) | -405.91          | -1.71                 | -405.44          | -1.24                 | -405.58          | -1.38                 | -405.11          | -0.90                 |
|          | db-MBE(1) | -126.71          | +277.49               | -277.20          | +127.00               | -286.31          | +117.89               | -298.07          | +106.13               |
|          | db-MBE(2) | -395.90          | +8.30                 | -401.49          | +2.71                 | -402.42          | +1.79                 | -403.24          | +0.96                 |
|          | db-MBE(3) | -404.20          | +0.01                 | -403.74          | +0.46                 | -403.68          | +0.53                 | -403.72          | +0.48                 |
|          | supermol. | -404.20          |                       | -404.20          |                       | -404.20          |                       | -404.20          |                       |
| <b>2</b> | eb-MBE(2) | -401.68          | +2.61                 | -403.01          | +1.28                 | -404.03          | +0.25                 | -401.97          | +2.31                 |
|          | eb-MBE(3) | -406.60          | -2.31                 | -406.10          | -1.82                 | -406.18          | -1.89                 | -405.60          | -1.31                 |
|          | db-MBE(1) | -129.47          | +274.81               | -278.58          | +125.71               | -288.12          | +116.16               | -299.55          | +104.73               |
|          | db-MBE(2) | -395.41          | +8.88                 | -402.27          | +2.02                 | -403.35          | +0.93                 | -404.26          | +0.02                 |
|          | db-MBE(3) | -404.19          | +0.10                 | -404.70          | -0.41                 | -404.69          | -0.40                 | -404.75          | -0.46                 |
|          | supermol. | -404.29          |                       | -404.29          |                       | -404.29          |                       | -404.29          |                       |
| <b>3</b> | eb-MBE(2) | -400.77          | -57.94                | -377.76          | -34.92                | -384.23          | -41.39                | -367.17          | -24.33                |
|          | eb-MBE(3) | -340.50          | +2.34                 | -341.27          | +1.57                 | -340.93          | +1.91                 | -341.77          | +1.06                 |
|          | db-MBE(1) | -216.14          | +126.70               | -298.29          | +44.55                | -302.28          | +40.55                | -304.20          | +38.64                |
|          | db-MBE(2) | -331.38          | +11.46                | -344.16          | -1.32                 | -344.60          | -1.76                 | -344.71          | -1.87                 |
|          | db-MBE(3) | -344.74          | -1.90                 | -343.04          | -0.20                 | -343.15          | -0.32                 | -342.82          | +0.02                 |
|          | supermol. | -342.84          |                       | -342.84          |                       | -342.84          |                       | -342.84          |                       |
| <b>4</b> | eb-MBE(2) | -362.08          | -20.22                | -354.41          | -12.55                | -359.30          | -17.44                | -349.47          | -7.61                 |
|          | eb-MBE(3) | -346.80          | -4.93                 | -345.29          | -3.43                 | -345.05          | -3.19                 | -343.76          | -1.90                 |
|          | db-MBE(1) | -187.17          | +154.69               | -285.42          | +56.45                | -290.57          | +51.29                | -294.90          | +46.96                |
|          | db-MBE(2) | -336.43          | +5.43                 | -341.22          | +0.65                 | -342.27          | -0.41                 | -342.23          | -0.37                 |
|          | db-MBE(3) | -340.40          | +1.46                 | -341.21          | +0.65                 | -340.97          | +0.89                 | -341.13          | +0.73                 |
|          | supermol. | -341.86          |                       | -341.86          |                       | -341.86          |                       | -341.86          |                       |

Table S16: Total interaction energies  $E_{\text{int}}^{\text{xx-MBE}(n)}$  (PBE0/TZP, in kJ/mol) of four isomers of  $\text{H}_3\text{O}^+(\text{H}_2\text{O})_4$  relative to the lowest-energy isomer as calculated with the energy-based MBE [eb-MBE( $n$ ),  $n = 2, 3$ ] as well as the density-based MBE [db-MBE( $n$ ),  $n = 1, 2, 3$ ]. The total interaction energies from supermolecular calculations as well as the errors in the total interaction energies compared to the supermolecular calculation  $\Delta_{\text{int}}^{\text{xx-MBE}(n)}$ , are given as reference. Included are results from both the isolated MBEs (“iso”) and the embedded MBEs using point-charge embedding (“PC”) as well as using frozen-density embedding with the unrelaxed frozen densities of the isolated fragments (“FDE”) and a relaxed frozen density obtained using freeze-and-thaw cycles (“FDE-ft”). All values are given in kJ/mol.

|          |           | iso              |                       | PC               |                       | FDE              |                       | FDE-ft           |                       |
|----------|-----------|------------------|-----------------------|------------------|-----------------------|------------------|-----------------------|------------------|-----------------------|
|          |           | $E_{\text{int}}$ | $\Delta_{\text{int}}$ | $E_{\text{int}}$ | $\Delta_{\text{int}}$ | $E_{\text{int}}$ | $\Delta_{\text{int}}$ | $E_{\text{int}}$ | $\Delta_{\text{int}}$ |
| <b>1</b> | eb-MBE(2) | -405.59          | +10.88                | -415.38          | +1.10                 | -413.91          | +2.57                 | -413.03          | +3.44                 |
|          | eb-MBE(3) | -422.03          | -5.56                 | -420.24          | -3.77                 | -420.58          | -4.10                 | -418.98          | -2.50                 |
|          | db-MBE(1) | -192.62          | +223.85               | -333.85          | +82.63                | -339.35          | +77.12                | -346.76          | +69.72                |
|          | db-MBE(2) | -413.40          | +3.07                 | -414.56          | +1.91                 | -415.50          | +0.97                 | -415.84          | +0.63                 |
|          | db-MBE(3) | -414.65          | +1.82                 | -415.66          | +0.81                 | -415.55          | +0.93                 | -415.75          | +0.72                 |
|          | supermol. | -416.47          |                       | -416.47          |                       | -416.47          |                       | -416.47          |                       |
| <b>2</b> | eb-MBE(2) | -457.05          | -47.28                | -438.71          | -28.93                | -444.04          | -34.26                | -428.55          | -18.78                |
|          | eb-MBE(3) | -407.55          | +2.23                 | -408.78          | +1.00                 | -408.17          | +1.61                 | -409.02          | +0.76                 |
|          | db-MBE(1) | -237.94          | +171.84               | -348.52          | +61.25                | -354.22          | +55.56                | -359.03          | +50.75                |
|          | db-MBE(2) | -395.14          | +14.63                | -410.03          | -0.25                 | -411.27          | -1.50                 | -411.56          | -1.79                 |
|          | db-MBE(3) | -412.96          | -3.18                 | -409.85          | -0.08                 | -409.87          | -0.09                 | -409.50          | +0.28                 |
|          | supermol. | -409.78          |                       | -409.78          |                       | -409.78          |                       | -409.78          |                       |
| <b>3</b> | eb-MBE(2) | -462.50          | -54.91                | -439.58          | -32.00                | -449.16          | -41.57                | -429.71          | -22.13                |
|          | eb-MBE(3) | -409.71          | -2.12                 | -409.02          | -1.44                 | -408.28          | -0.69                 | -408.21          | -0.62                 |
|          | db-MBE(1) | -266.01          | +141.57               | -363.64          | +43.94                | -368.00          | +39.58                | -370.66          | +36.93                |
|          | db-MBE(2) | -395.23          | +12.36                | -408.47          | -0.89                 | -409.70          | -2.12                 | -409.75          | -2.17                 |
|          | db-MBE(3) | -408.39          | -0.80                 | -408.03          | -0.44                 | -407.93          | -0.34                 | -407.68          | -0.09                 |
|          | supermol. | -407.59          |                       | -407.59          |                       | -407.59          |                       | -407.59          |                       |
| <b>4</b> | eb-MBE(2) | -451.96          | -43.33                | -435.69          | -27.06                | -441.80          | -33.18                | -427.10          | -18.47                |
|          | eb-MBE(3) | -409.49          | -0.86                 | -409.26          | -0.63                 | -409.05          | -0.43                 | -409.14          | -0.52                 |
|          | db-MBE(1) | -245.27          | +163.36               | -353.43          | +55.19                | -358.16          | +50.46                | -361.64          | +46.99                |
|          | db-MBE(2) | -397.27          | +11.36                | -409.31          | -0.68                 | -410.08          | -1.46                 | -410.47          | -1.84                 |
|          | db-MBE(3) | -409.86          | -1.23                 | -409.13          | -0.50                 | -409.20          | -0.57                 | -408.91          | -0.28                 |
|          | supermol. | -408.63          |                       | -408.63          |                       | -408.63          |                       | -408.63          |                       |

Table S17: Total interaction energies  $E_{\text{int}}^{\text{xx-MBE}(n)}$  (PBE0/TZP, in kJ/mol) of four isomers of  $\text{H}_3\text{O}^+(\text{H}_2\text{O})_5$  relative to the lowest-energy isomer as calculated with the energy-based MBE [eb-MBE( $n$ ),  $n = 2, 3$ ] as well as the density-based MBE [db-MBE( $n$ ),  $n = 1, 2, 3$ ]. The total interaction energies from supermolecular calculations as well as the errors in the total interaction energies compared to the supermolecular calculation  $\Delta_{\text{int}}^{\text{xx-MBE}(n)}$ , are given as reference. Included are results from both the isolated MBEs (“iso”) and the embedded MBEs using point-charge embedding (“PC”) as well as using frozen-density embedding with the unrelaxed frozen densities of the isolated fragments (“FDE”) and a relaxed frozen density obtained using freeze-and-thaw cycles (“FDE-ft”). All values are given in kJ/mol.

|          |           | iso              |                       | PC               |                       | FDE              |                       | FDE-ft           |                       |
|----------|-----------|------------------|-----------------------|------------------|-----------------------|------------------|-----------------------|------------------|-----------------------|
|          |           | $E_{\text{int}}$ | $\Delta_{\text{int}}$ | $E_{\text{int}}$ | $\Delta_{\text{int}}$ | $E_{\text{int}}$ | $\Delta_{\text{int}}$ | $E_{\text{int}}$ | $\Delta_{\text{int}}$ |
| <b>1</b> | eb-MBE(2) | -547.88          | -24.92                | -538.84          | -15.89                | -542.46          | -19.51                | -530.54          | -7.59                 |
|          | eb-MBE(3) | -526.39          | -3.44                 | -525.47          | -2.52                 | -525.82          | -2.87                 | -525.15          | -2.20                 |
|          | db-MBE(1) | -233.38          | +289.57               | -399.49          | +123.46               | -409.93          | +113.02               | -421.35          | +101.60               |
|          | db-MBE(2) | -502.25          | +20.70                | -520.97          | +1.98                 | -522.52          | +0.43                 | -523.93          | -0.98                 |
|          | db-MBE(3) | -526.57          | -3.62                 | -523.34          | -0.39                 | -523.37          | -0.42                 | -523.09          | -0.13                 |
|          | supermol. | -522.95          |                       | -522.95          |                       | -522.95          |                       | -522.95          |                       |
| <b>2</b> | eb-MBE(2) | -511.21          | -42.73                | -496.93          | -28.46                | -504.10          | -35.62                | -486.33          | -17.85                |
|          | eb-MBE(3) | -473.81          | -5.34                 | -471.66          | -3.19                 | -471.38          | -2.90                 | -470.42          | -1.95                 |
|          | db-MBE(1) | -290.74          | +177.74               | -413.28          | +55.20                | -418.60          | +49.88                | -422.99          | +45.48                |
|          | db-MBE(2) | -455.63          | +12.85                | -469.42          | -0.95                 | -470.91          | -2.43                 | -471.18          | -2.70                 |
|          | db-MBE(3) | -468.53          | -0.06                 | -469.15          | -0.68                 | -469.01          | -0.53                 | -468.75          | -0.27                 |
|          | supermol. | -468.48          |                       | -468.48          |                       | -468.48          |                       | -468.48          |                       |
| <b>3</b> | eb-MBE(2) | -504.07          | -35.34                | -491.60          | -22.88                | -499.77          | -31.04                | -484.49          | -15.76                |
|          | eb-MBE(3) | -471.93          | -3.20                 | -470.71          | -1.98                 | -470.00          | -1.27                 | -469.62          | -0.89                 |
|          | db-MBE(1) | -292.57          | +176.16               | -417.42          | +51.31                | -422.23          | +46.49                | -426.63          | +42.10                |
|          | db-MBE(2) | -458.85          | +9.88                 | -469.77          | -1.04                 | -471.33          | -2.60                 | -471.46          | -2.73                 |
|          | db-MBE(3) | -468.45          | +0.28                 | -469.70          | -0.97                 | -469.49          | -0.76                 | -469.30          | -0.57                 |
|          | supermol. | -468.73          |                       | -468.73          |                       | -468.73          |                       | -468.73          |                       |
| <b>4</b> | eb-MBE(2) | -497.15          | -33.06                | -487.08          | -22.99                | -492.18          | -28.09                | -478.66          | -14.57                |
|          | eb-MBE(3) | -468.28          | -4.18                 | -466.72          | -2.63                 | -466.74          | -2.65                 | -465.99          | -1.90                 |
|          | db-MBE(1) | -278.79          | +185.30               | -405.39          | +58.71                | -410.30          | +53.79                | -414.46          | +49.64                |
|          | db-MBE(2) | -453.45          | +10.65                | -464.13          | -0.04                 | -465.11          | -1.01                 | -465.60          | -1.51                 |
|          | db-MBE(3) | -464.17          | -0.07                 | -464.40          | -0.30                 | -464.42          | -0.32                 | -464.19          | -0.10                 |
|          | supermol. | -464.09          |                       | -464.09          |                       | -464.09          |                       | -464.09          |                       |

Table S18: Interaction energies (PBE0/TZP, in kJ/mol) of four isomers of  $\text{H}_3\text{O}^+(\text{H}_2\text{O})_3$  relative to the lowest-energy isomer calculated with the energy-based MBE [eb-MBE( $n$ ),  $n = 2, 3$ ] as well as the density-based MBE [db-MBE( $n$ ),  $n = 1, 2, 3$ ]. The relative interaction energies from supermolecular calculations are given as reference. Included are results from both the isolated MBEs (“iso”) and the embedded MBEs using point-charge embedding (“PC”) as well as using frozen-density embedding with the unrelaxed frozen densities of the isolated fragments (“FDE”) and a relaxed frozen density obtained using freeze-and-thaw cycles (“FDE-ft”). All values are given in kJ/mol.

|        | isomer   | $E_{\text{int,rel}}^{\text{super}}$ | $E_{\text{int,rel}}^{\text{eb-MBE}(n)}$ |         | $E_{\text{int,rel}}^{\text{db-MBE}(n)}$ |         |         |
|--------|----------|-------------------------------------|-----------------------------------------|---------|-----------------------------------------|---------|---------|
|        |          |                                     | $n = 2$                                 | $n = 3$ | $n = 1$                                 | $n = 2$ | $n = 3$ |
| iso    | <b>2</b> | -0.08                               | -2.29                                   | -0.68   | -2.76                                   | 0.49    | 0.01    |
|        | <b>1</b> | 0.00                                | 0.00                                    | 0.00    | 0.00                                    | 0.00    | 0.00    |
|        | <b>3</b> | 61.36                               | -1.39                                   | 65.41   | -89.43                                  | 64.52   | 59.46   |
|        | <b>4</b> | 62.34                               | 37.31                                   | 59.12   | -60.46                                  | 59.47   | 63.80   |
| PC     | <b>2</b> | -0.08                               | -0.21                                   | -0.67   | -1.38                                   | -0.77   | -0.95   |
|        | <b>1</b> | 0.00                                | 0.00                                    | 0.00    | 0.00                                    | 0.00    | 0.00    |
|        | <b>3</b> | 61.36                               | 25.04                                   | 64.17   | -21.08                                  | 57.33   | 60.71   |
|        | <b>4</b> | 62.34                               | 48.39                                   | 60.15   | -8.21                                   | 60.27   | 62.53   |
| FDE    | <b>2</b> | -0.08                               | -1.78                                   | -0.60   | -1.81                                   | -0.94   | -1.01   |
|        | <b>1</b> | 0.00                                | 0.00                                    | 0.00    | 0.00                                    | 0.00    | 0.00    |
|        | <b>3</b> | 61.36                               | 18.03                                   | 64.66   | -15.97                                  | 57.82   | 60.52   |
|        | <b>4</b> | 62.34                               | 42.96                                   | 60.53   | -4.26                                   | 60.15   | 62.71   |
| FDE-ft | <b>2</b> | -0.08                               | -1.03                                   | -0.49   | -1.48                                   | -1.02   | -1.03   |
|        | <b>1</b> | 0.00                                | 0.00                                    | 0.00    | 0.00                                    | 0.00    | 0.00    |
|        | <b>3</b> | 61.36                               | 33.77                                   | 63.33   | -6.13                                   | 58.53   | 60.90   |
|        | <b>4</b> | 62.34                               | 51.47                                   | 61.34   | 3.17                                    | 61.01   | 62.59   |

Table S19: Interaction energies (PBE0/TZP, in kJ/mol) of four isomers of  $\text{H}_3\text{O}^+(\text{H}_2\text{O})_4$  relative to the lowest-energy isomer calculated with the energy-based MBE [eb-MBE( $n$ ),  $n = 2, 3$ ] as well as the density-based MBE [db-MBE( $n$ ),  $n = 1, 2, 3$ ]. The relative interaction energies from supermolecular calculations are given as reference. Included are results from both the isolated MBEs (“iso”) and the embedded MBEs using point-charge embedding (“PC”) as well as using frozen-density embedding with the unrelaxed frozen densities of the isolated fragments (“FDE”) and a relaxed frozen density obtained using freeze-and-thaw cycles (“FDE-ft”). All values are given in kJ/mol.

|        |          | $E_{\text{int,rel}}^{\text{super}}$ | $E_{\text{int,rel}}^{\text{eb-MBE}(n)}$ |         | $E_{\text{int,rel}}^{\text{db-MBE}(n)}$ |         |      |
|--------|----------|-------------------------------------|-----------------------------------------|---------|-----------------------------------------|---------|------|
| isomer | $n = 2$  |                                     | $n = 3$                                 | $n = 1$ | $n = 2$                                 | $n = 3$ |      |
| iso    | <b>1</b> | 0.00                                | 0.00                                    | 0.00    | 0.00                                    | 0.00    | 0.00 |
|        | <b>2</b> | 6.70                                | -51.46                                  | 14.48   | -45.31                                  | 18.26   | 1.70 |
|        | <b>4</b> | 7.85                                | -46.37                                  | 12.55   | -52.65                                  | 16.13   | 4.79 |
|        | <b>3</b> | 8.89                                | -56.91                                  | 12.32   | -73.39                                  | 18.17   | 6.26 |
| PC     | <b>1</b> | 0.00                                | 0.00                                    | 0.00    | 0.00                                    | 0.00    | 0.00 |
|        | <b>2</b> | 6.70                                | -23.33                                  | 11.47   | -14.68                                  | 4.53    | 5.81 |
|        | <b>4</b> | 7.85                                | -20.31                                  | 10.98   | -19.59                                  | 5.25    | 6.53 |
|        | <b>3</b> | 8.89                                | -24.21                                  | 11.22   | -29.80                                  | 6.09    | 7.64 |
| FDE    | <b>1</b> | 0.00                                | 0.00                                    | 0.00    | 0.00                                    | 0.00    | 0.00 |
|        | <b>2</b> | 6.70                                | -30.13                                  | 12.41   | -14.87                                  | 4.23    | 5.68 |
|        | <b>4</b> | 7.85                                | -27.90                                  | 11.52   | -18.81                                  | 5.42    | 6.35 |
|        | <b>3</b> | 8.89                                | -35.25                                  | 12.30   | -28.65                                  | 5.80    | 7.62 |
| FDE-ft | <b>1</b> | 0.00                                | 0.00                                    | 0.00    | 0.00                                    | 0.00    | 0.00 |
|        | <b>2</b> | 6.70                                | -15.52                                  | 9.96    | -12.27                                  | 4.28    | 6.25 |
|        | <b>4</b> | 7.85                                | -14.07                                  | 9.83    | -14.88                                  | 5.37    | 6.84 |
|        | <b>3</b> | 8.89                                | -16.68                                  | 10.77   | -23.90                                  | 6.09    | 8.07 |

Table S20: Interaction energies (PBE0/TZP, in kJ/mol) of four isomers of  $\text{H}_3\text{O}^+(\text{H}_2\text{O})_5$  relative to the lowest-energy isomer calculated with the energy-based MBE [eb-MBE( $n$ ),  $n = 2, 3$ ] as well as the density-based MBE [db-MBE( $n$ ),  $n = 1, 2, 3$ ]. The relative interaction energies from supermolecular calculations are given as reference. Included are results from both the isolated MBEs (“iso”) and the embedded MBEs using point-charge embedding (“PC”) as well as using frozen-density embedding with the unrelaxed frozen densities of the isolated fragments (“FDE”) and a relaxed frozen density obtained using freeze-and-thaw cycles (“FDE-ft”). All values are given in kJ/mol.

|        | isomer   | $E_{\text{int,rel}}^{\text{super}}$ | $E_{\text{int,rel}}^{\text{eb-MBE}(n)}$ |         | $E_{\text{int,rel}}^{\text{db-MBE}(n)}$ |         |         |
|--------|----------|-------------------------------------|-----------------------------------------|---------|-----------------------------------------|---------|---------|
|        |          |                                     | $n = 2$                                 | $n = 3$ | $n = 1$                                 | $n = 2$ | $n = 3$ |
| iso    | <b>1</b> | 0.00                                | 0.00                                    | 0.00    | 0.00                                    | 0.00    | 0.00    |
|        | <b>3</b> | 54.22                               | 43.81                                   | 54.46   | -59.19                                  | 43.41   | 58.13   |
|        | <b>2</b> | 54.47                               | 36.66                                   | 52.57   | -57.36                                  | 46.63   | 58.04   |
|        | <b>4</b> | 58.86                               | 50.72                                   | 58.11   | -45.41                                  | 48.81   | 62.41   |
| PC     | <b>1</b> | 0.00                                | 0.00                                    | 0.00    | 0.00                                    | 0.00    | 0.00    |
|        | <b>3</b> | 54.22                               | 47.24                                   | 54.76   | -17.92                                  | 51.20   | 53.64   |
|        | <b>2</b> | 54.47                               | 41.91                                   | 53.81   | -13.79                                  | 51.55   | 54.19   |
|        | <b>4</b> | 58.86                               | 51.76                                   | 58.75   | -5.90                                   | 56.84   | 58.94   |
| FDE    | <b>1</b> | 0.00                                | 0.00                                    | 0.00    | 0.00                                    | 0.00    | 0.00    |
|        | <b>3</b> | 54.22                               | 42.69                                   | 55.82   | -12.30                                  | 51.19   | 53.88   |
|        | <b>2</b> | 54.47                               | 38.36                                   | 54.44   | -8.66                                   | 51.61   | 54.36   |
|        | <b>4</b> | 58.86                               | 50.27                                   | 59.08   | -0.37                                   | 57.41   | 58.96   |
| FDE-ft | <b>1</b> | 0.00                                | 0.00                                    | 0.00    | 0.00                                    | 0.00    | 0.00    |
|        | <b>3</b> | 54.22                               | 46.05                                   | 55.53   | -5.27                                   | 52.47   | 53.79   |
|        | <b>2</b> | 54.47                               | 44.21                                   | 54.73   | -1.64                                   | 52.75   | 54.34   |
|        | <b>4</b> | 58.86                               | 51.88                                   | 59.16   | 6.90                                    | 58.32   | 58.89   |
